# Supplementary material for: MicroRNAs: new players in IBD
Source: PubMed Central journal article supplement (PMC4345829; doi:10.1136/gutjnl-2014-307891), 2014-12-04
Supplement: gutjnl-2014-307891-s1.pdf [file gutjnl-2014-307891-s1.pdf]

**Supplementary table 1: Studies of microRNA expression**

| Authors                  | Cohort                                                                                                                                                                      | Samples                          | miRNA expression                                                                                                                                                                                                                                                                                             | miRNA down-regulation                                                                                                                                                     |
|--------------------------|-----------------------------------------------------------------------------------------------------------------------------------------------------------------------------|----------------------------------|--------------------------------------------------------------------------------------------------------------------------------------------------------------------------------------------------------------------------------------------------------------------------------------------------------------|---------------------------------------------------------------------------------------------------------------------------------------------------------------------------|
| <b>Iborra</b> [w1]       | 9 active and 9 inactive CD<br>9 active and 9 inactive UC vs<br>33 healthy controls(serum<br>only)                                                                           | Serum and<br>colonic<br>biopsies | <b>Active vs inactive CD</b><br>miR-188-5p, -877, -18a†, -629†, let-7b†, -140-3p†<br><b>Active vs inactive UC</b> miR-188-5p, -877, -650†, 548a-3p†                                                                                                                                                          | <b>Active vs inactive CD</b><br>miR-140-5p, -145, -18a, -128,-422a†, -885-5p†, -328†<br><b>Active vs inactive UC</b><br>miR-140-5p, -145, -18a, -128,-630†, -489†, -196b† |
| <b>Paraskevi</b><br>[w2] | 128 CD and 88 UC vs 162<br>healthy controls                                                                                                                                 | Peripheral<br>blood              | <b>CD</b><br>miR-16, -23a, -29a, 106a, -107, -126, -191, -199a-5p, -200c, -362-3p, -532-3p<br><b>UC</b><br>miR-16, -21, -28-5p, -151-5p, -155, 199a-5p                                                                                                                                                       |                                                                                                                                                                           |
| <b>Duttgupta</b><br>[w3] | 20 active UC vs 20 healthy<br>controls                                                                                                                                      | Peripheral<br>blood              | <b>UC</b><br>miR-188-5p, -378, -422a, -500,-501-5p, -769-5p, -874                                                                                                                                                                                                                                            |                                                                                                                                                                           |
| <b>Wu</b> [w4]           | 14 active CD vs 13 healthy<br>controls<br>5 inactive CD vs 13 healthy<br>controls<br><br>13 active UC vs 13 healthy<br>controls<br>10 inactive UC vs 13 healthy<br>controls | Peripheral<br>blood              | <b>Active CD</b><br>miR-199a-5p, -340, -363-3p,<br>-532-3p, miRplus-E1271<br><b>Inactive CD</b><br>miR-340<br><b>Active UC</b><br>miR-28-5p, -151-5p, -103-2, -199a-5p, -340, -362-3p, -532-3p,<br>miRplus-E1271<br><b>Inactive UC</b><br>miR-28-5p, 103-2, 149, 151-5p, -340, -532-3p, and<br>miRplus-E1153 | <b>Active CD</b><br>miR-149, miRplus-F1065<br><b>Inactive CD</b><br>miR149<br><b>Active UC</b><br>miR-505<br><b>Inactive UC</b><br>miR-505                                |
| <b>Zahm</b> [w5]         | 46 active CD vs 32 healthy<br>controls                                                                                                                                      | Serum                            | <b>active CD</b><br>miR-16, -20a, -21, -30e, -93, -106a, -140, -192, -195, -484, let-7b                                                                                                                                                                                                                      |                                                                                                                                                                           |
| <b>Bian</b> [w6]         | 5 active UC vs 4 healthy<br>controls                                                                                                                                        | Colonic<br>biopsies              | <b>active UC</b><br>miR-150                                                                                                                                                                                                                                                                                  |                                                                                                                                                                           |
| <b>Fasseu</b><br>[w7]    | 8 active UC vs 8 healthy<br>controls<br><br>8 inactive UC vs 8 healthy                                                                                                      | Colonic<br>biopsies              | <b>Active UC</b><br>miR-7, -31, -135b, 223, 29a, 29b, -126, -127-3p, and -324-3p<br><b>Inactive UC</b><br>miR-196a, -29a, 29b, -126,                                                                                                                                                                         | <b>Active UC</b><br>miR-188-5p, -215, -320a, and<br>-346<br><b>Inactive UC</b>                                                                                            |

|                    |                                                                                      |                         |                                                                                                                                                                                                                                                                                                                                                                            |                                                |
|--------------------|--------------------------------------------------------------------------------------|-------------------------|----------------------------------------------------------------------------------------------------------------------------------------------------------------------------------------------------------------------------------------------------------------------------------------------------------------------------------------------------------------------------|------------------------------------------------|
|                    | controls<br>8 active CD vs 8 healthy controls<br>8 inactive CD vs 8 healthy controls |                         | -127-3b, and -324-3p<br><b>Active CD</b><br>miR-9, -21, -22, -26a, -29a, 29c, 30b, -31, -34c-5p, -106a, -126, -126, -127-3p, -130a, -133b, -146a, -146b-3p, -150, 155, -181c, -196a, -324-3p, -375<br><b>Inactive CD</b><br>miR-9, -21, -22, -26a, 29b, 29c, 30a, -30b, -30c -31, -34c-5p, 106a, -126, -127-3p, -133b, -146a, 146b-3p, -150, -155, -196a -223, and -324-3p | miR-188-5p, -215, -320a, and 346               |
| <b>Pekow</b> [w8]  | 8 active UC vs 8 healthy controls                                                    | Colonic biopsies        |                                                                                                                                                                                                                                                                                                                                                                            | miR-143, -145                                  |
| <b>Takagi</b> [w9] | 12 active UC vs 12 healthy controls                                                  | Colonic biopsies        | miR-21, -155                                                                                                                                                                                                                                                                                                                                                               |                                                |
| <b>Wu</b> [w10]    | 5 active CD vs 13 healthy controls<br>6 aSBCD vs 13 healthy controls                 | Colonic and SB biopsies | <b>Active CD(colonic)</b><br>miR-23b, -106a, and -191<br><b>aSBCD</b><br>miR-16, -21, -223, and 594                                                                                                                                                                                                                                                                        | <b>Active CD (colonic)</b><br>miR-19b and -629 |
| <b>Wu</b> [w11]    | 15 active UC vs 15 healthy controls                                                  | Colonic biopsies        | miR-16, -21, 23a, 24, 29a, 126, 195, and left-7f                                                                                                                                                                                                                                                                                                                           | miR-192, 375, and 422b                         |
| <b>Lin</b> [w12]   | 19 with IBD vs 18 controls with diverticular disease                                 | Colectomy tissues       | miR-31, -206, -424, -146a                                                                                                                                                                                                                                                                                                                                                  |                                                |

miR† denotes miRNA expression in tissues. All studies used qRT-PCR and/or microarray techniques for miRNA expression except for Lin et al who performed next generation sequencing.

**Abbreviations:** CD: crohn's disease, UC: ulcerative colitis, SBCD: small bowel crohn's disease, miR: miRNA; IBD: inflammatory bowel disease

## References

- w1 Iborra M, Bernuzzi F, Correale C, *et al.* Identification of serum and tissue micro-RNA expression profiles in different stages of inflammatory bowel disease. *Clin Exp Immunol* 2013;**173**:250–8. doi:10.1111/cei.12104
- w2 Paraskevi A, Theodoropoulos G, Papaconstantinou I, *et al.* Circulating MicroRNA in inflammatory bowel disease. *J Crohns Colitis* 2012;**6**:900–4. doi:10.1016/j.crohns.2012.02.006
- w3 Duttagupta R, DiRienzo S, Jiang R, *et al.* Genome-wide maps of circulating miRNA biomarkers for ulcerative colitis. *PLoS One* 2012;**7**:e31241. doi:10.1371/journal.pone.0031241
- w4 Wu F, Guo NJ, Tian H, *et al.* Peripheral blood microRNAs distinguish active ulcerative colitis and Crohn's disease. *Inflamm Bowel Dis* 2011;**17**:241–50. doi:10.1002/ibd.21450
- w5 Zahm AM, Thayu M, Hand NJ, *et al.* Circulating microRNA is a biomarker of pediatric Crohn disease. *J Pediatr Gastroenterol Nutr* 2011;**53**:26–33. doi:10.1097/MPG.0b013e31822200cc
- w6 Bian Z, Li L, Cui J, *et al.* Role of miR-150-targeting c-Myb in colonic epithelial disruption during dextran sulphate sodium-induced murine experimental colitis and human ulcerative colitis. *J Pathol* 2011;**225**:544–53. doi:10.1002/path.2907
- w7 Fasseu M, Tréton X, Guichard C, *et al.* Identification of restricted subsets of mature microRNA abnormally expressed in inactive colonic mucosa of patients with inflammatory bowel disease. *PLoS One* 2010;**5**. doi:10.1371/journal.pone.0013160
- w8 Pekow JR, Dougherty U, Mustafi R, *et al.* miR-143 and miR-145 are downregulated in ulcerative colitis: putative regulators of inflammation and protooncogenes. *Inflamm Bowel Dis* 2012;**18**:94–100. doi:10.1002/ibd.21742
- w9 Takagi T, Naito Y, Mizushima K, *et al.* Increased expression of microRNA in the inflamed colonic mucosa of patients with active ulcerative colitis. *J Gastroenterol Hepatol* 2010;**25 Suppl 1**:S129–33. doi:10.1111/j.1440-1746.2009.06216.x
- w10 Wu F, Zhang S, Dassopoulos T, *et al.* Identification of microRNAs associated with ileal and colonic Crohn's disease. *Inflamm Bowel Dis* 2010;**16**:1729–38. doi:10.1002/ibd.21267
- w11 Wu F, Zikusoka M, Trindade A, *et al.* MicroRNAs are differentially expressed in ulcerative colitis and alter expression of macrophage inflammatory peptide-2 alpha. *Gastroenterology* 2008;**135**:1624–1635.e24. doi:10.1053/j.gastro.2008.07.068

w12 Lin J, Welker NC, Zhao Z, *et al.* Novel specific microRNA biomarkers in idiopathic inflammatory bowel disease unrelated to disease activity. *Mod Pathol* 2014;**27**:602–8. doi:10.1038/modpathol.2013.152
